# Supplementary material for: Self-template/activation nitrogen-doped porous carbon materials derived from lignosulfonate-based ionic liquids for high performance supercapacitors
Source: Royal Society of Chemistry journal article supplement (doi:10.1039/d0ra06821g), 2020-01-01
Supplement: d0ra06821g1.pdf [file d0ra06821g1.pdf]

# Supporting information for

## Self-template/activation nitrogen-doped porous carbon materials derived from lignosulfonate for high performance supercapacitors

Qinqin Xu<sup>#</sup>, Xia Wang,<sup>#</sup> Jian Cheng, Lin Zhang, Feng He, Haibo Xie\*

*Department of New Energy Science & Engineering, College of Materials & Metallurgy,  
Guizhou University, Huaxi District, Guiyang 550025, P.R.China*

**\*Corresponding Authors:**

Haibo Xie, E-mail: [hbxie@gzu.edu.cn](mailto:hbxie@gzu.edu.cn)

### 1. Electrochemical measurements

The gravimetric capacitance ( $C_g$ , F g<sup>-1</sup>) of a single electrode is calculated from the discharge curves according to the following equation (1)<sup>1-4</sup>:

$$C_{g=m} = \frac{2I \Delta t}{\Delta V} \quad (1)$$

where I (A) is the constant discharge current,  $\Delta t$  (s) the discharge time, m (g) the mass of the active material in a single electrode, and  $\Delta V$  (V) the voltage change in discharge.

The gravimetric energy density ( $W_g$ , Wh kg<sup>-1</sup>) and power density ( $P_g$ , W kg<sup>-1</sup>) of the two-electrode symmetric supercapacitors are also calculated according to equation (2 & 3):

$$W_g = \frac{C_g \Delta V^2}{8 \times 3.6} \quad (2)$$

$$P_g = \frac{3600 \times W_g}{\Delta t} \quad (3)$$

where  $C_g$  (F g<sup>-1</sup>) represents the gravimetric specific capacitance of a single electrode obtained from equation (1),  $\Delta V$  (V) the voltage change in discharge, and  $\Delta t$  (s) the discharge time.

## 2. Figures

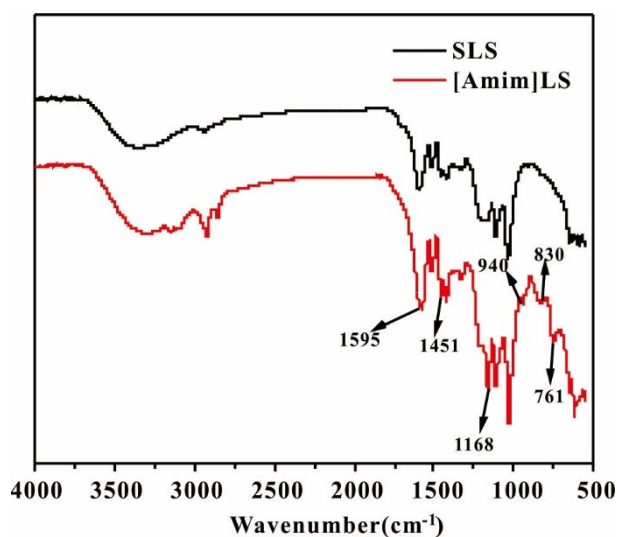

**Figure S1.** FTIR spectra of SLS and [Amim]LS precursor

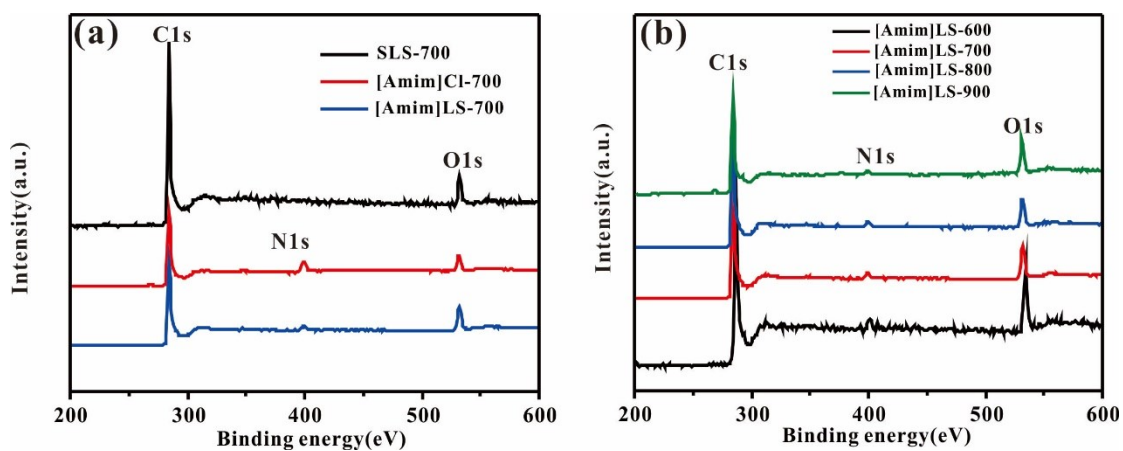

**Figure S2.** Wide-scan XPS spectra of (a) SLS-700, [Amim]Cl-700 and [Amim]LS-700 carbon samples, (b) carbon samples at different preparation temperatures (600 °C - 900 °C) ([Amim]LS-600, [Amim]LS-700, [Amim]LS-800 and [Amim]LS-900)

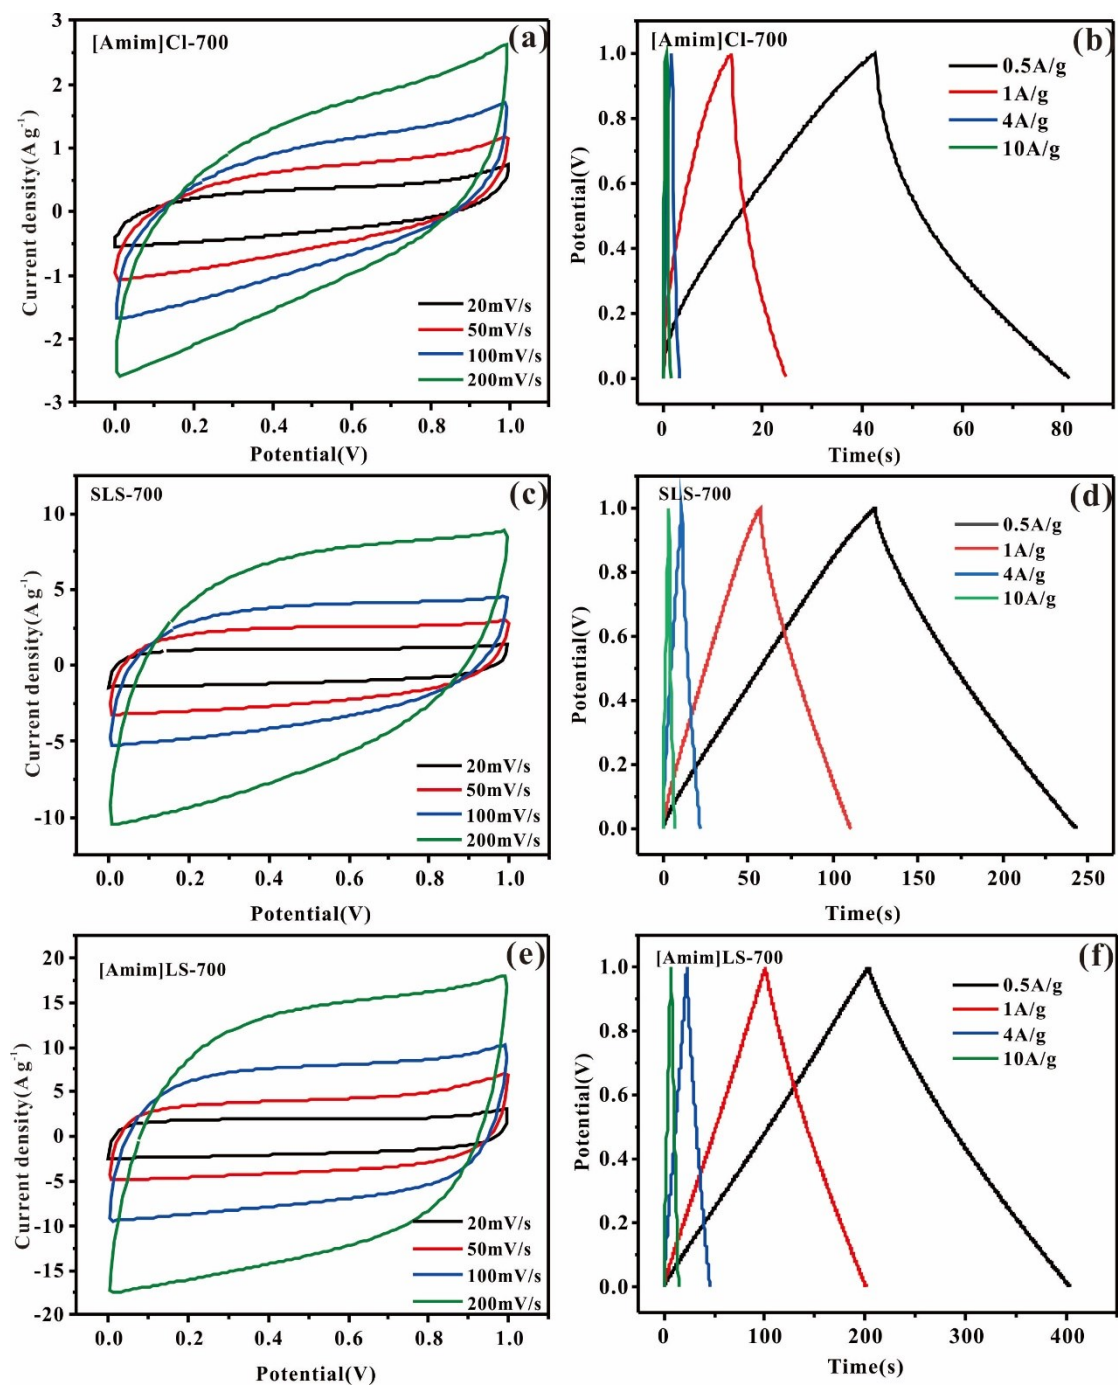

**Figure S3.** (a) (c) (e) CV curves at 20 mV s<sup>-1</sup> - 200 mV s<sup>-1</sup> and (b) (d) (f) GCD curves at 0.5 A g<sup>-1</sup> ~ 10 A g<sup>-1</sup> of SLS-700, [Amim]Cl-700 and [Amim]LS-700 carbon samples in 6 mol L<sup>-1</sup> KOH

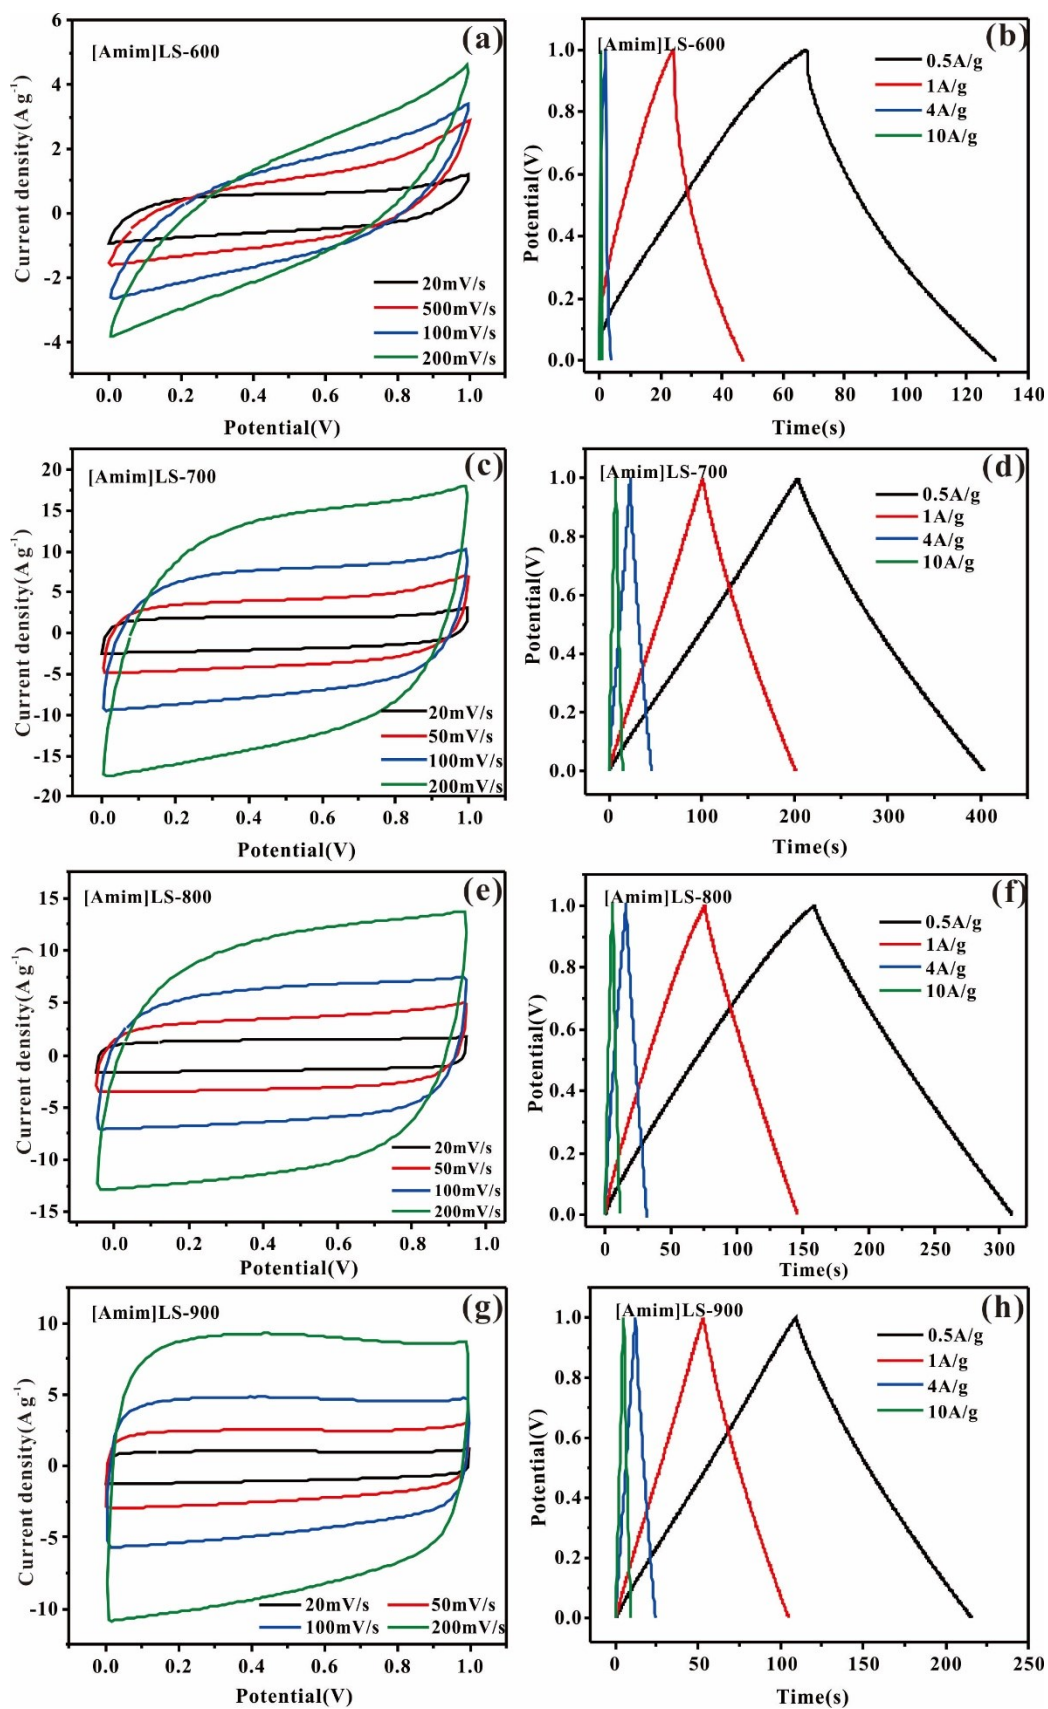

**Figure S4.** (a) (c) (e) (g) CV curves at  $20 \text{ mV s}^{-1} \sim 200 \text{ mV s}^{-1}$  and (b) (d) (f) (h) GCD curves at  $0.5 \text{ A g}^{-1} \sim 10 \text{ A g}^{-1}$  of [Amim]LS-X carbon samples in  $6 \text{ mol L}^{-1}$  KOH

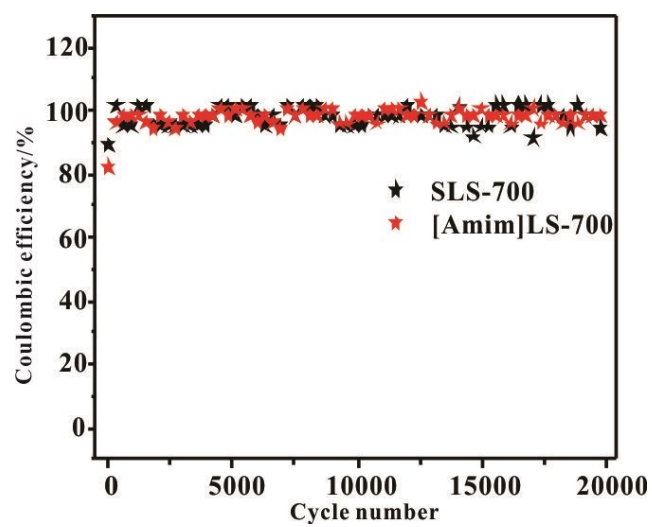

**Figure S5.** Coulombic efficiency of SLS-700 and [Amim]LS-700 carbon samples

**Table S1 The calculated parameters of the equivalent circuit for the obtained carbon samples**

|                 | [Amim]LS-600 | [Amim]LS-700 | [Amim]LS-800 | [Amim]LS-900 | SLS-700 | [Amim]Cl-700 |
|-----------------|--------------|--------------|--------------|--------------|---------|--------------|
| Rs ( $\Omega$ ) | 0.489        | 0.293        | 0.473        | 0.373        | 0.334   | 0.472        |
| Rct( $\Omega$ ) | 15.661       | 0.713        | 0.25         | 0.499        | 1.171   | 1.234        |

**Table S2 Comparison of the supercapacitance performance in this work and other literatures**

| Electrode                                          | Electrolyte | Frequency range | Potential window (V) | Current density ( $A\ g^{-1}$ ) | Specific capacitance ( $F\ g^{-1}$ ) | Energy density ( $Wh\ kg^{-1}$ ) | Power density ( $W\ kg^{-1}$ ) | Refs |
|----------------------------------------------------|-------------|-----------------|----------------------|---------------------------------|--------------------------------------|----------------------------------|--------------------------------|------|
| Lignosulfonate derived hierarchical porous carbons | 7 M KOH     | 0.01Hz~100k Hz  | 0 – 1                | 0.05                            | 247                                  | 3.4                              | 6.18                           | 5    |
| Molten salt synthesis of nitrogen-doped carbon     | 1 M KOH     | 0.01Hz~100k Hz  | -1 – 0               | 0.5                             | 252                                  | 8.75                             | 125                            | 6    |
| Nitrogen-doped ordered mesoporous carbons          | 6 M KOH     | 0.01Hz~100k Hz  | -0.9 - 0.1           | 0.5                             | 230                                  | 5.11                             | 100                            | 7    |
| Sustainable nitrogen-                              |             | 0.01Hz~100k     |                      |                                 |                                      |                                  |                                |      |

|                                                                             |                                    |                       |                |            |            |             |           |                  |
|-----------------------------------------------------------------------------|------------------------------------|-----------------------|----------------|------------|------------|-------------|-----------|------------------|
| containing hierarchical porous carbon                                       |                                    | Hz                    |                |            |            |             |           |                  |
| Biomass derived interconnected hierarchical micro-meso-macro- porous carbon | 1 M H <sub>2</sub> SO <sub>4</sub> | 0.01Hz~100k Hz        | -0.1 - 0.9     | 0.2        | 550        | 19.09       | 50        | 9                |
| Fishbone-derived N-doped hierarchical porous carbon                         | 1 M H <sub>2</sub> SO <sub>4</sub> | 0.01Hz~100k Hz        | 0 – 1.0        | 0.1        | 476        | 21.2        | 39        | 10               |
| Nitrogen-Doped Porous Carbon                                                | 6 M KOH                            | 0.01Hz~100k Hz        | 0 - 1.0        | 1          | 202        | 7.01        | 250       | 11               |
| <b>[Amim]LS-700</b>                                                         | <b>6 M KOH</b>                     | <b>0.01Hz~100k Hz</b> | <b>0 - 1.0</b> | <b>0.1</b> | <b>230</b> | <b>7.99</b> | <b>25</b> | <b>This work</b> |

Ref:

1. J.-w. Lang, X.-b. Yan, W.-w. Liu, R.-t. Wang and Q.-j. Xue, *J. Power Sources*, 2012, **204**, 220-229.
2. L. Sun, C. G. Tian, M. T. Li, X. Y. Meng, L. Wang, R. H. Wang, J. Yin and H. G. Fu, *J. Mater Chem. A*, 2013, **1**, 6462-6470.
3. G. Wang, J. Huang, S. Chen, Y. Gao and D. Cao, *J. Power Sources*, 2011, **196**, 5756-5760.
4. N. Jha, P. Ramesh, E. Bekyarova, M. E. Itkis and R. C. Haddon, *ADV ENERGY MATER*, 2012, **2**, 438-444.
5. J. Pang, W. Zhang, J. Zhang, G. Cao, M. Han and Y. Yang, *Green Chemistry*, 2017, **19**, 3916-3926.
6. X. Deng, B. Zhao, L. Zhu and Z. Shao, *Carbon*, 2015, 48-58.
7. Q. Shi, R. Zhang, Y. Lv, Y. Deng and D. Zhao, *Carbon*, 2015, **84**, 335-346.
8. J. Pang, W. Zhang, H. Zhang, J. Zhang, H. Zhang, G. Cao, M. Han and Y. Yang, *Carbon*, 2018, **132**, 280-293.
9. S. Yang, S. Wang, X. Liu and L. Li, *Carbon*, 2019, **147**, 540-549.
10. J. M. A, S. I. W. B, Q. L. A, P. Z. A, J. Z. A, Y. Z. A, J. S. B and S. Z. A, *Journal of Alloys Compounds*, 2020, **832**.
11. L. F. Chen, X. D. Zhang, H. W. Liang, M. Kong, Q. F. Guan, P. Chen, Z. Y. Wu and S. H. Yu, *Acs Nano*, 2012, **6**, 7092-7102.
